# Supplementary material for: Preventing packaging of translatable P5-associated DNA contaminants in recombinant AAV vector preps
Source: PubMed Central journal article supplement — Mol Ther Methods Clin Dev. 2022 Jan 19;24:280–91. doi: 10.1016/j.omtm.2022.01.008 (PMC8829444; doi:10.1016/j.omtm.2022.01.008), 2022-01-19
Supplement: mmc1.pdf [file mmc1.pdf]

**Supplemental information**

**Preventing packaging of translatable**

**P5-associated DNA contaminants**

**in recombinant AAV vector preps**

**Mark A. Brimble, Pei-Hsin Cheng, Stephen M. Winston, Isaiah L. Reeves, Aisha Souquette, Yunyu Spence, Junfang Zhou, Yong-Dong Wang, Christopher L. Morton, Marcus Valentine, Paul G. Thomas, Amit C. Nathwani, John T. Gray, and Andrew M. Davidoff**

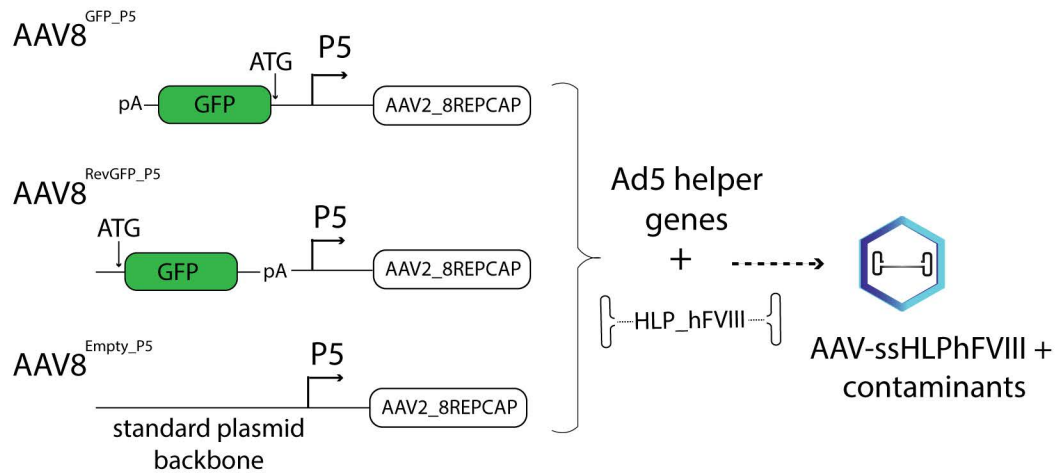

**Supplementary Figure 1. Contaminant reporter cassettes in AAV REPCAP plasmids.** Schematic of designed P5-associated contaminant AAV REPCAP constructs used for production of AAV8ssHLP\_hFVIII. Forward facing arrows denote transcriptional start site. Downward arrows denote location of start codon

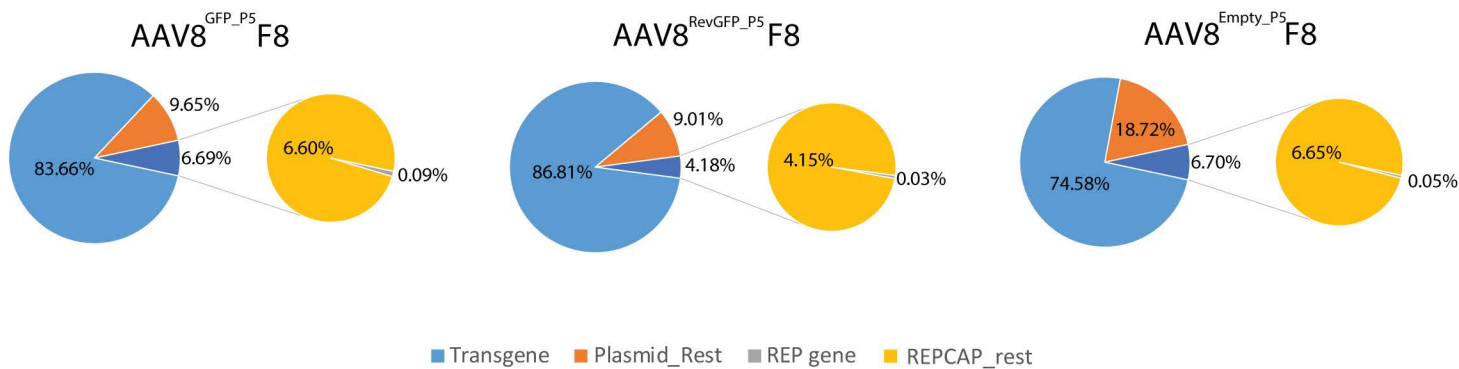

**Supplementary Figure 2. Incorporation of designed P5-associated contaminants in rAAV.**

Pie charts of NGS confirmation of designed P5-associated contaminants within AAV. For AAV8<sup>GFP\_P5</sup>F8 (left), AAV8<sup>RevGFP\_P5</sup>F8 (middle), and AAV8<sup>Empty\_P5</sup>F8 (right). Reads mapped as in Fig. 1d.

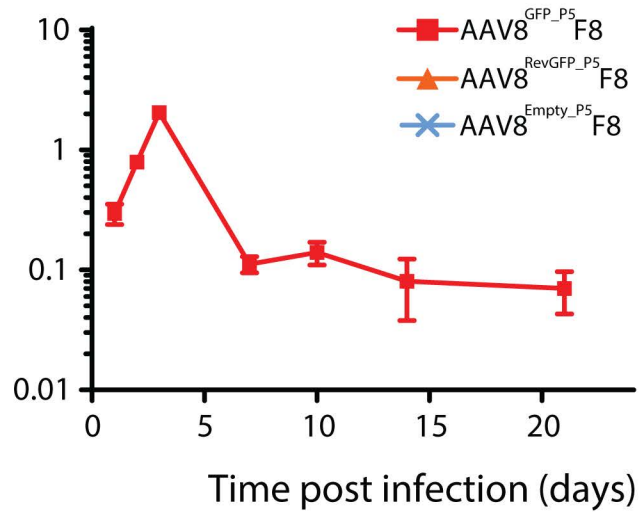

**Supplementary Figure 3. Contaminant translation in continually passaged 293T cells.** Logarithmic representation of data depicted in figure 2d: Time course graph depicting detectable GFP positive cells in AAV8ssHLPPhFVIII post infected (5e6 MOI) with AAV8<sup>GFP\_P5</sup>F8 (red), AAV8<sup>REV GFP\_P5</sup>F8 (Orange) or AAV<sup>Empty\_P5</sup>F8 (Blue). (Values for AAV8<sup>REV GFP\_P5</sup>F8 and AAV<sup>Empty\_P5</sup>F8 all below y-axis limit).

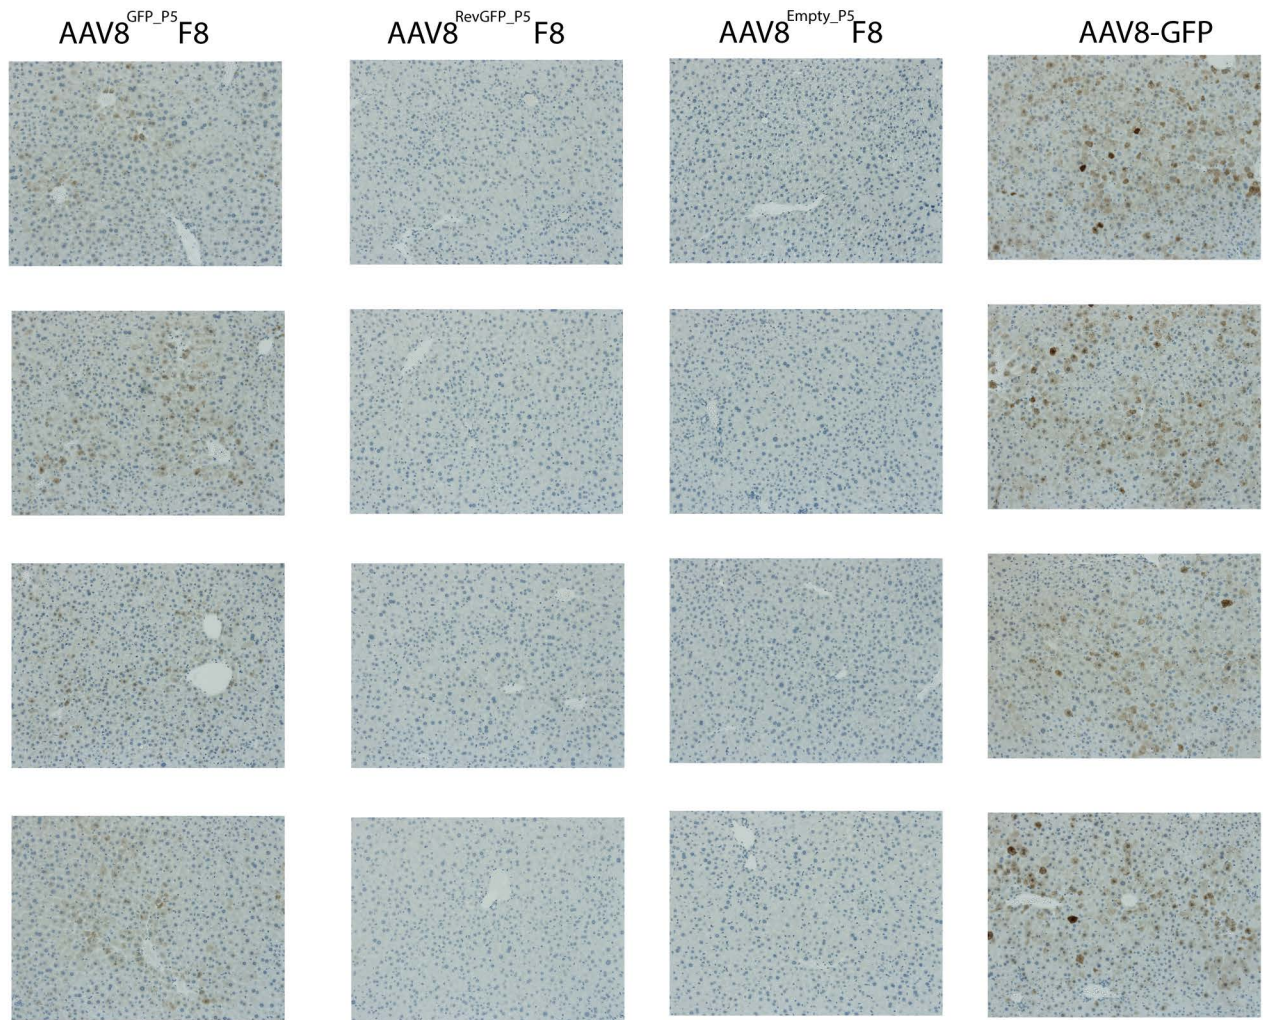

**Supplementary Figure 4. Translation of P5-associated rAAV contaminants.**

Representative IHC images of C57BL/6J mouse liver sections stained for GFP protein 1-week post  $9.4 \times 10^{11}$ vg AAV8ssHLPHFVIII infection from each additional mouse in treatment groups from experiment shown in Fig. 1h.

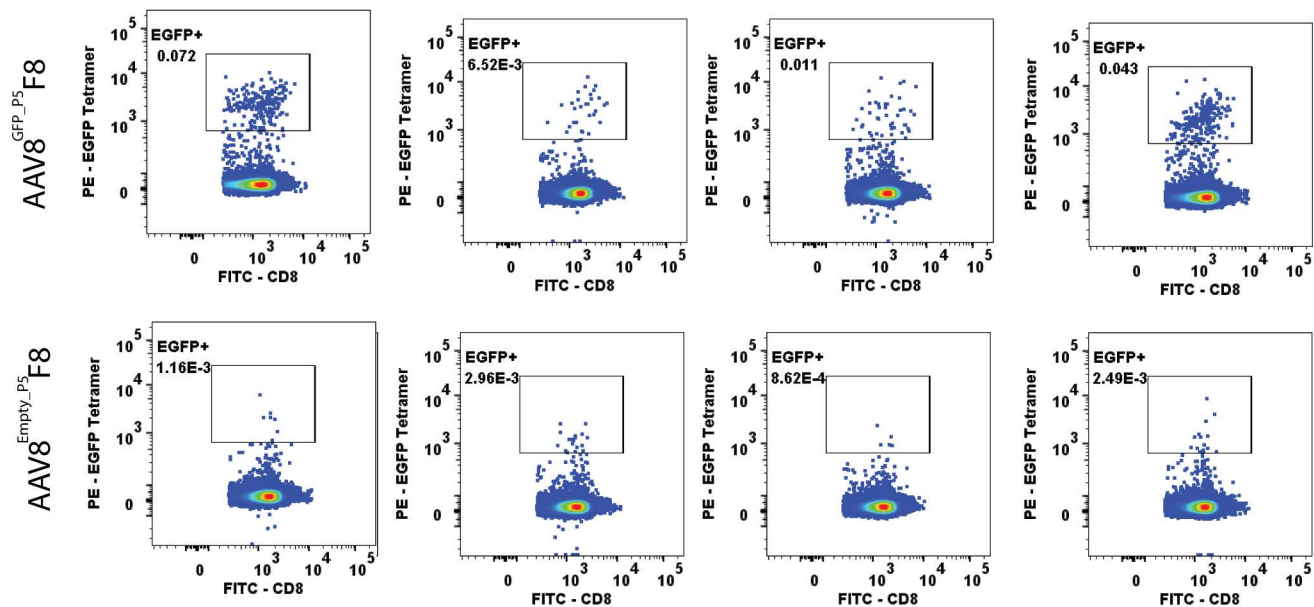

**Supplementary Figure 5. Immunogenicity of P5-associated rAAV contaminants.**

FACS plots for BALB/cJ GFP reactive splenic CD8<sup>+</sup>T cells 9 days post infection from each additional mouse in experiment shown in Fig. 2f. Top row: AAV8<sup>GFP\_P5</sup>F8; bottom row: AAV8<sup>Empty\_P5</sup>F8.

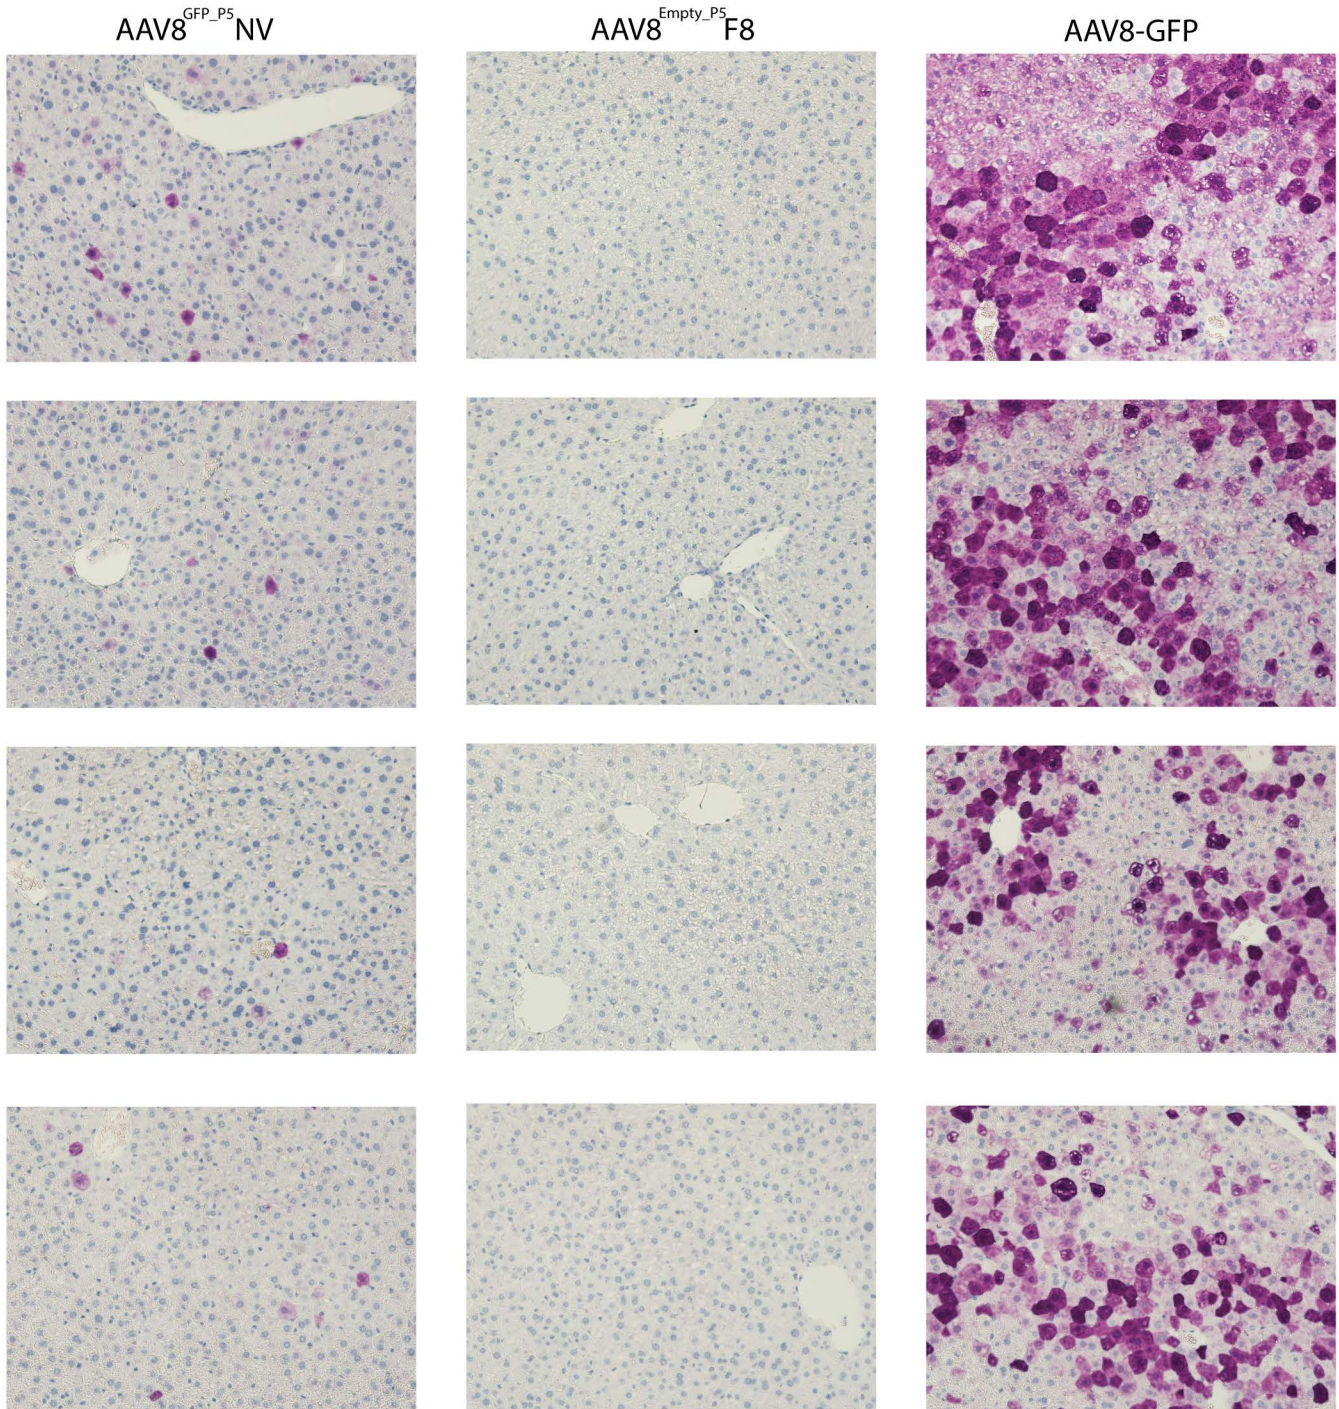

**Supplementary Figure 6. Translation of P5-associated rAAV contaminants in absence of expression cassette.**

Representative IHC images of C57BL/6J mouse liver sections stained for GFP protein 1-week post  $2.7 \times 10^{11}$ vg GFP copy infection from each additional mouse in treatment groups from experiment shown in Fig. 4d.

a P5 promoter

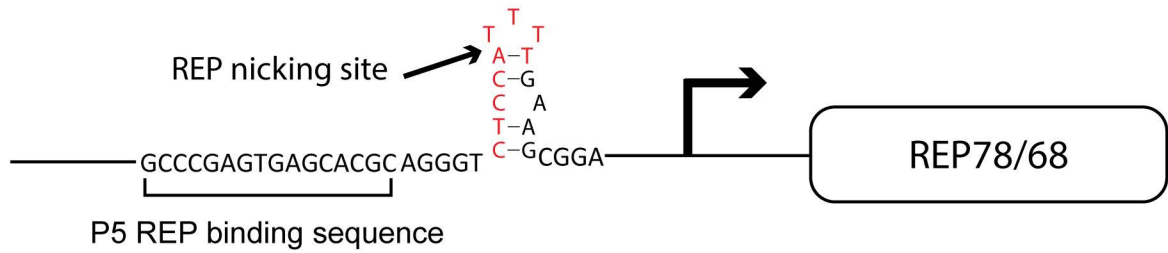

b P5 $\Delta$ nick

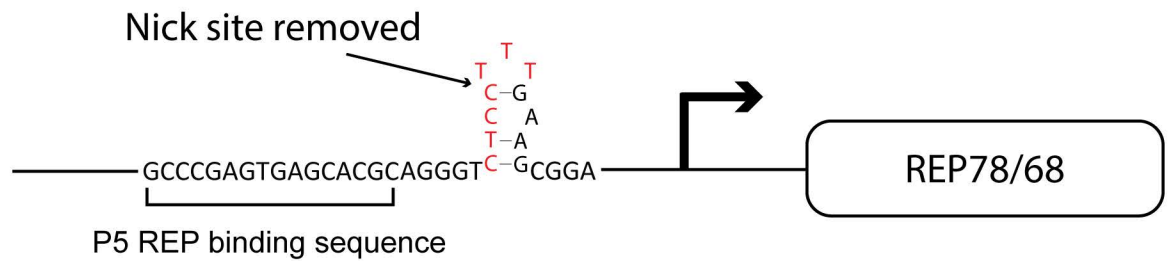

c P5-HS5 promoter sequence

TAGAGGTCCTGTATTAGAGGTCACGTGAGTGTTTTGCGACATTTTGCACACCATGTGG  
 TCACGCTGGGTATTTAAGCCCGAGTGAGCACGCAGGGT**GCAACCTCCATTT**TGAAGCG  
 GGAGGTTTGAACGCGCAGCCACC

d P5-HS100 promoter sequence

TAGAGGTCCTGTATTAGAGGTCACGTGAGTGTTTTGCGACATTTTGCACACCATGT  
 GGTCACGCTGGGTATTTAAGCCCGAGTGAGCACGCAGGGT**AGGTAGCAACTATCAC**  
**TCAAGAAGCAGACACAGTAAGACACGGTCTAGCTGACTGTCTATCGGCTAG-**  
**GTCAA ATAGAGAGCTTTGATATCTGCATGTCTACCTCCATTT**TGAAGCGGGAG-  
 GTTTGAACGCGCAGCCACC

**Supplementary Figure 7. Alternative P5 promoter designs.**

**(a-b)** Schematics of AAV production REP78/68 promoters (a) P5 promoter detailing REP binding site in relative positioning to YY1+1 binding site (red), (b) P5 $\Delta$ nick promoter in which the AT dinucleotide within the YY1+1 binding site (red) has been deleted. Forward facing arrows denote transcriptional start site. **(c-d)** P5-HS promoter designs: **(c)** Sequence of P5-HS5 promoter with spacer sequence (blue) and YY1+1 binding site (red) highlighted. **(d)** Sequence of P5-HS100 promoter with spacer sequence (blue) and YY1+1 binding site (red) highlighted.



### AAV8scLP1hFIXco

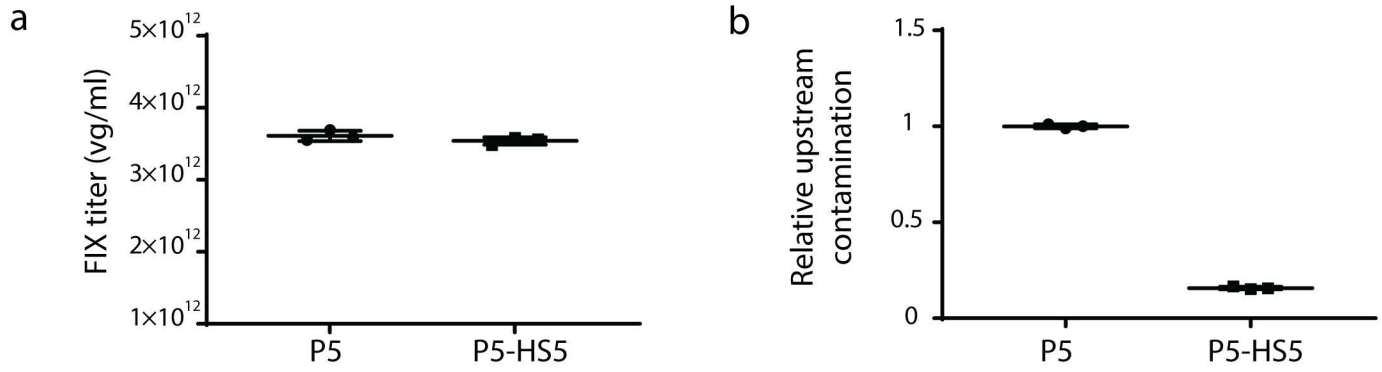

### AAV8ssHLPhFVIII

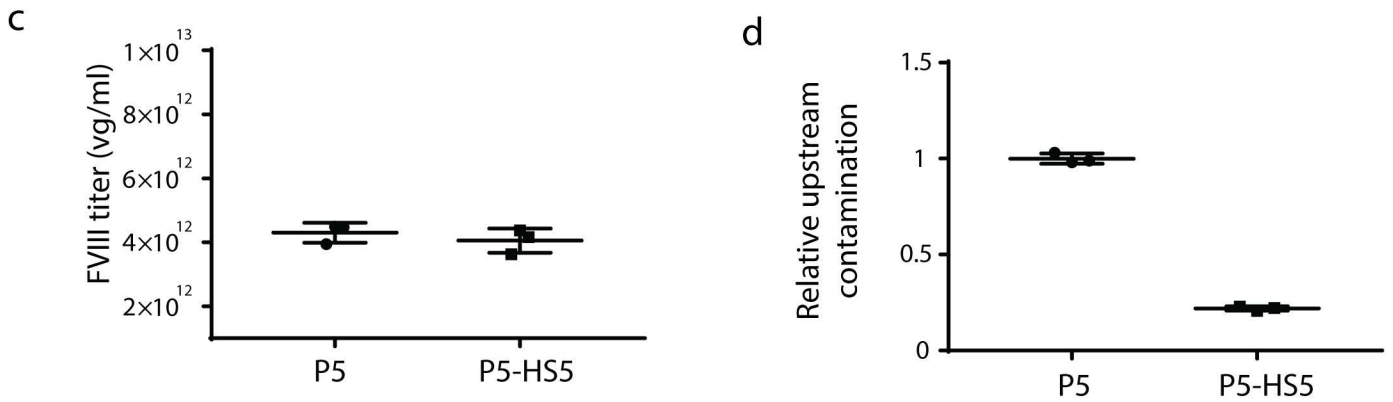

**Supplementary Figure 8. Cell factory scale P5-HS production.**

(a+b) AAV8scLP1hFIXco and (c+d) AAV8ssHLPhFVIII analyzed by qPCR for titer (a+c) and relative contamination upstream of the REP78/68 promoter (b+d).

Contaminant FISH probe sequence:

CATTGCCATTCAGGCTGCGCAACTGTTGGGAAGGGCGATCGGTGCGGGCCTCTTCGCTATTACGCCAGCTGGCGAAAGGGGGATGTGCTGCAAGGCGATTAAGTTGGG  
TAACGCCAGGGTTTTCCAGTCACGACGTTGTAACACGACGGCCAGTGAATTGTAATACGACTCACTATAGGGCGAATTGGGCCCTCTAGATGCATGCTCGAGCGGCCGCC  
AGTGTGATGGATATCTGCAGAATTCGGCTTATCGTGGATCCAAGCTTCACCATGGGAGACGTCACCGGTTCTAGAGGTCCTGTATTAGAGGTCACGTGAGTGTTCGCGAC  
ATTTTGCACACCATGTGGTCACGCTGGGTATTTAAGCCGAGTGAGCACGACGGGTCTCCATTTTGAAGCGGGAGGTTTGAACGCGCAGCCACCACGGCGGGGTTTTA  
CGAGATTGTGATTAAGGTCCCCAGCGACCTTGACGAGCATCTGCCCGGCATTTCTGACAGCTTTGTGAAGTGGGTGGCCGAGAAGGAATGGGAGTTGCCGCCAGATTCTG  
ACATGGATCTGAATCTGATTGAGCAGGCACCCCTGACCGTGGCCGAGAAGCTGCAGCGGACTTTCTGACGGAATGGCGCGGTGTGAGTAAGGCCCCCGAGGCCCTTTT  
CTTTGTGCAATTTGAGAAGGGAGAGACTACTTCCACATGCACGTGCTCGTGGAAACCACCGGGGTGAAATCCATGGTTTTGGGACGTTTCTGAGTCAGATTTCGCGAAA  
AACTGATTACAGAGAATTTACCGCGGGATCGAGCCGACTTTGCCAACTGGTTCGCGGTCAAAAGACCAGAAATGGCGCCGAGCGGGAACAAGGTGGTGGATGAGTG  
CTACATCCCAATTACTTGTCCCAAAACCCAGCCTGAGCTCCAGTGGGCGTGGACTAATATGGAACAGTATTTAAGCGCCTGTTTGAATCTCACGGAGCGTAAACGGTTG  
GTGGCGCAGCATCTGACGCACGTGTCGACAGCGCAGGAGCAGAACAAGAGAATCAGAATCCAATTCTGATGCGCCGGTATCAGATCAAAAATTCAGCCAGGTACAT  
GGAGCTGGTCGGTGGCTCGTGGACAAGGGGATTACCTCGGAGAAGCAGTGGATCCAGGAGGACCAGGCCCTACATCTCCTTCAATGCGGCCCTCAACTCGCGGTC  
CCAAATCAAGGCTGCCTGGACAATGCGGGAAAGATTATGAGCCTGACTAAAACCGCCCCGACTACCTGGTGGGCCAGCAGCCCGTGGAGGACATTTCCAGCAATCGGA  
TTTATAAAATTTTGAACATAACGGGTACGATCCCAATATGCGGCTTCCGCTTTTCTGGGATGGGCCACGAAAAAGTTTCGGCAAGAGGAACACCATCTGGCTGTTTGGGC  
CTGCAACTACCGGGAAGACCAACATCGCGGAGGCCATAGCCCACTGTGCCCTTCTACGGGTGCGTAACTGGACCAATGAGAACTTTCCCTTCAACGACTGTGTCGAC  
AAGATGGTGTGATCTGGTGGGAGGAGGGGAAGATGACCGCCAAGGTCTGGAGTTCGGCCAAAGCCATTCTCGGAGGAAGCAAGGTGCGCGTGGACCAGAAATGCAAGTCC  
TCGGCCAGATAGACCCGACTCCCGTATGTCACCTCCAACACCAACATGTGCGCCGTGATTGACGGAACTCAACGACCTTGAACACCAGCAGCCGTTGCAAGACC  
GGATGTTCAAATTTGAAGTACCCGCGCTCGGATCATGACTTTGGAAAGTCAACAAGCAGGAAGTCAAAGACTTTTTCCGGTGGGCAAAGGATCACGTGGTTGAGGTG  
GAGCATGAATTTACGTCAAAAAGGGTGGAGCCAAGAAAAGACCCGCCCCAGTACGCAGATATAAGTGAGCCCAAACGGGTGCGCGAGTCAATTGCGCAGCCATCGA  
CGTCAGACGCGGAAGCTTCGATCAACTACGCAGACAGGTACCAAAAACAATGTTCTCGTCACGTGGGCATGAATCTGATGCTGTTCCCTGCAGACAATGCGAGAGAATGA  
ATCAGAATTCAAATATCTGCTTCACTCACGGACAGAAAGACTGTTTAGAGTGCTTTCCCGTGTGAGAATCTCAACCCGTTTCTGTCGTCAAAAAGGCGTATCAGAACTGTG  
CTACATTCATCATATCATGGAAAGGTGCCAGACGCTTGCACCTGCGATCTGGTCAATGTGGATTTGGATGACTGCATCTTTGAACAATAAATGATTTAAATCAGGTATG  
GCTGCCGATGGTTATCTCCAGATTGGCTCGAGGACAACCTCTCTGAGGGCATTGCGAGTGGTGGGCGCTGAAACCTGGAGCCCGAAGCCCAAAGCCAACCCAGCAA  
AGCAGGACGACGGCCGGGTCTGGTGTCTCCTGGCTACAAGTACCTCGGACCCCTCAACGACTCGACAAGGGGGAGCCGCTCAACGCGGGCGACGCAGCGGCCCTC  
GAGCAGACAAGGCCTACGACCAGCAGCTGCAGGCGGGTGAATCCGTACCTGCGGTATAACCACGCCGACCCGAGTTTCAGGAGCGTCTGCAAGAAGATACGTCTT  
TTGGGGCAACCTCGGGCGAGCAGTCTCCAGGCCAAGAAGCGGGTTCTCGAACCTCTCGGTCTGGTTGAGGAAGGCGCTAAGACGGCTCCTGGAAGAAGAGACCCG  
GTAGAGCCATCACCCAGCGTTCTCCAGACTCCTCTACGGGATCGGCAAGAAAGGCCAACAGCCCGCCAGAAAAAGACTCAATTTTGGTACAGACTGGCGACTCAGAGT  
CAGTTCCAGACCCTCAACCTCTCGGAGAACCTCCAGCAGCGCCCTCTGGTGTGGGACCTAATAAATGGCTGCAGGCGGTGGCGCACCATGGCAGACAATAACGAAGG  
CGCCGACGGAGTGGGTAGTTCTCGGGAAATTGGCATTGCGATTCCACATGGCTGGGCGACAGAGTCAACACCAGCACCCGAACCTGGGCCCTGCCACCTACAAC  
AACCACCTCTACAAGCAAACTCCAACGGGACATCGGGAGGAGCCACCAACGACAACACCTACTTCGGCTACAGCACCCCTGGGGGATTTTGTACTTTAAGATTCCAC  
TGCCACTTTTACCACGTGACTGGCAGCGACTCATCAACAACAACCTGGGGATTCCGGCCAAAGAGACTCAGCTTCAAGCTCTTCAACATCCAGGTCAAGGAGGTCACGCA  
GAATGAAGGCACCAAGACCATCGCCAATAACCTCACCAGCACCATCCAGGTGTTTACGGACTCGGAGTACCAGCTGCCGTACGTTCTCGGCTCTGCCACCAGGGCTGC  
CTGCTCCGTTCCCGGCGGACGTGTTTCATGATTCCCAGTACGGCTACCTAACACTCAACAACGGTAGTCAGGCGGTGGGACGCTCCTCCTTCTACTGCTGGAATACTTT  
CCTTCGAGATGCTGAGAACCGGCAACAACCTCCAGTTTACTTACACCTTCGAGGACGTGCCTTTCCACAGCAGCTACGCCACAGCCAGAGCTTGGACCGCTGATGAA  
TCCTCTGATTGACCAGTACCTGTACTACTTGTCTCGGACTCAAACAACAGGAGGCACGGCAAATACGCAGACTCTGGGCTTCAGCCAAGGTGGGCCTAATAACAATGGCCAA  
TCAGGCAAAGAAGTGGCTGCCAGGACCTGTTACCGCCAACAACGCGTCTCAACGACAACCGGGCAAAAACAACAATAGCAACTTTGCCTGGACTGCTGGGACCAAAATACC  
ATCTGAATGGAAGAAATTCATTGGCTAATCCTGGCATCGCTATGGCAACACACAAGACGACGAGGAGCGTTTTTTTCCAGTAACGGGATCCTGATTTTTGGCAAACAAA  
TGCTGCCAGAGACAATGCGGATTACAGCGATGTCATGCTCACCAGCGAGGAAGAAATCAAACCACTAACCCCTGTGGCTACAGAGGAATACGGTATCGTGGCAGATAACTT  
GCAGCAGCAAAACACGGCTCCTCAAATTTGAACTGTCAACAGCCAGGGGGCCTTACCCGTATGGTCTGGCAGAACCAGGACGTGTACCTGCAGGGTCCCATCTGGGCC  
AAGATTCTCACACGGACGGCAACTTCCACCCGTCTCCGCTGATGGGCGGCTTTGGCCTGAAACATCCTCCGCTCAGATCCTGATCAAGAACACGCCTGTACCTGCGGA  
TCCTCCGACCACCTTCAACCAGTCAAAGCTGAACTTTTCATCACGCAATACAGCACCAGGACAGGTGAGGTAATGGGAGCTGCAGAAGGAAAACAGCAAGC  
GCTGGAACCCCGAGATCCAGTACCTCCAACACTTACAATCTACAAGTGTGGACTTTGCTGTTAATACAGAAGGCGTGTACTCTGAACCCCGCCCATTTGGCACCCGTT  
ACCTCACCCGTAATCTGTAATTGCTTGTAAATCAATAAACCGTTTAAATCGTTTCAGTTGAACTTTGGTCTCTGCGTATTTCTTTCTTATCTAGTTTCCATGCTCTAGAACCTAGG  
GAGCTCTGGTACCCACTAGTGTGATGCTATTACAAGCCGAATTCAGCACACTGGCGGCCGTTACTAGTGGATCCGAGCTCGGTACCAAGCTTGGCGTAATCATGGTATAG  
CTGTTTCTGTGTGAAATTTGTTATCCGCTCACAATTCACACAACATACGAGCCGGAAGCATAAAGTGTAAAGCCTGGGGTGCCATGAGTGAGCTAACTCACATTAATTGC  
GTTGCGCTCACTGCCCGCTTTCAGTCGGGAACCTGTCGTGCCA

GCTGCATTAATGAATCGGCCAACGCGGGGAGAGGCGGTTTGCCTATTGGGCGCTCTTCCGCTTCTCGCTCACTGACTCGCTGCGCTGGTCTGTTCCGGCTGCGGCG  
AGCGGTATCAGCTCACTCAAAGGCGGTAATACGGTTATCCACAGAATCAGGGGATAACGCAGGAAAGAACATGTGAGCAAAAGGCCAGCAAAAGGCCAGGAACCGTAAAA  
AGGCCGCGTTGCTGGCGTTTTTCCATAGGCTCCGCCCCCTGACGAGCATCACAAAAATCGACGCTCAAGTCAGAGGTGGCGAAACCCGACAGGACTATAAAGATACCAG  
GCGTTTTCCCGTGAAGCTCCCTCGTGCCTCTCTGTTCCGACCCTGCCGCTTACCGGATACCTGTCCGCTTTCTCCCTTCGGGAAGCGTGGCGCTTTCTCATAGCTC  
ACGCTGTAGGTATCTCAGTTCGGTGTAGGTCTGCTCCAAGCTGGGCTGTGTGCACGAACCCCGTTAGCCGACCGCTGCGCCTTATCCGGTAACATCGTCTTG  
AGTCCAACCCGTAAGACACGACTTATCGCCACTGGCAGCAGCCACTGGTAACAGGATTAGCAGAGCGAGGTATGTAGGCGGTGTACAGAGTCTTGAAGTGGTGGCCT  
AACTACGGCTACACTAGAAGAACAGTATTGGTATCTGCGCTCTGCTGAAGCCAGTTACCTTCGAAAAAGAGTTGGTAGCTCTTGATCCGGCAAAACAAACCACCGCTGGT  
AGCGGTGGTTTTTTGTTTGAAGCAGCAGATTACGCGCAGAAAAAAGGATCTCAAGAAGATCCTTTGATCTTTTCTACGGGGTGTGACGCTCAGTGAACGAAAACTCA  
CGTTAAGGGATTTTGGTCATGAGATTCAAAAAGGATCTTACCTAGATCCTTTAAATTAATAAATGAAGTTTTAAATCAATCTAAAGTATATATGAGTAAACTTGGTCTGACAG  
TTACCAATGCTTAATCAGTGAGGCACCTATCTCAGCGATCTGTCTATTTGTTTACCTCATAGTTGCCCTGACTCCCGTGTGTAGATAACTACGATACGGGAGGGCTTACCAT  
CTGGCCCCAGTGTGCAATGATACCGCGAGACCCACGCTCACCGGCTCCAGATTTATCAGCAATAAACAGCCAGCCGGAAGGGCCGAGCGCAGAAGTGGTCTGCAAC  
TTTATCCGCTCCATCCAGTCTATTAATTGTTGCCGGGAAGCTAGAGTAAGTAGTTCCGCAAGTTAATAGTTTGCACAACGTTGTTGCCATTGCTACAGGCATCGTGGTGTAC  
GCTCGTCTGTTGGTATGGCTTCATTGAGCTCCGTTCCCAACGATCAAGGCGAGTTACATGATCCCCATGTTGTGCAAAAAAGCGGTTAGCTCCTTCGGTCTCCGATCG  
TTGTGAGAAGTAAGTTGGCCGAGTGTATCACTCATGGTTATGGCAGCACTGCATAATTCTCTTACTGTGATGCCATCCGTAAGATGCTTTTTCTGTGACTGGTGTGACTC  
AACCAAGTCATTCTGAGAATAGTGTATGCGGCGACCGAGTTGCTCTTGGCCCGCGTCAATACGGGATAATACCGCGCCACATAGCAGAACCTTTAAAAGTGTCTCATCATTGGA  
AAACGTTCTTCGGGGCGAAAACTCTCAAGGATCTTACCCTGTTGAGATCCAGTTCCGATGTAACCCACTCGTGCACCCAATGATCTTACGATCTTTTACTTTACCAGCG  
TTTCTGGGTGAGCAAAAACAGGAAGGCAAAATGCCGCAAAAAAGGGAATAAGGGCGACACGAAATGTTGAATACTCATACTCTTCTTTTTCAATTCAGAAGAACTCGTCA  
AGAAGGCGATAGAAGCGATGCGCTGCGAATCGGGAGCGGCGATACCGTAAAGCAGGAAAGCGGTGAGCCATTGCGCGCAAGCTCTTACGCAATATCACGGGTAG  
CCAACGCTATGCTGTAGACGGTCCGCCACACCCAGCCGCCACAGTCGATGAATCCAGAAAAGCGGCCATTTTCCACCATGATATTGCGCAAGCAGGCATCGCCATGG  
GTCACGACGAGATCCTCGCCGTGGGCATGCGCGCCTTGAGCCTGGCGAACAGTTCCGGTGGCGCGAGCCCTGATGCTCTTCTGTCAGATCATCCTGATCGACAAGA  
CCGGCTTCATCCGAGTACGTGCTCGCTCGATGCGATGTTTCTGCTTGGTGGTGAATGGGCGAGTAGCCGGATCAAGCGTATGACGCCGCCGATTGATCAGCCATGAT  
GGATACTTTCTCGGCAGGAGCAAGGTGGGATGACAGGAGATCTGCCCGGCACTTCGCCAATAGCAGCCAGTCCCTTCCCGCTTCACTGACAACGTCGAGCACAGCT  
GCGCAAGGAACGCCGTCGTGGCCAGCCACGATAGCCGCGCTGCCTCGTCTGCAAGTTCATTAGGGCACCGGACAGGTGGTCTTGACAAAAAGAACCGGGCGCCC  
CTGCGCTGACAGCCGGAACACGGCGGCATCAGAGCAGCCGATTGTCTGTTGTGCCAGTCATAGCCGAATAGCCTCTCCACCCAAGCGGCGCGGAGAACCTGCGTGCAAT  
CCATCTTGTCAATCATGCGAAACGATCCTCATCCTGTCTCTTGATCAGATCTTATGCCCTGCGCCATCAGATCCTTGGCGGCAAGAAAGCCATCCAGTTTACTTTGACAG  
GCTTCCCAACCTTACCAGAGGGCGCCCCAGCTGGCAATCCGGTTCGCTTGTGTCATAAAACCGCCAGTCTAGCTATGCCATGTAAGCCCACTGCAAGCTACCTGC  
TTTTCTTTGCGCTTGCCTTTCCCTGTCCAGATAGCCAGTAGCTGACATTATCCGGGGTACGACCCGTTTCTGCGGACTGGCTTTCTACGTGTTCCGCTTCTTTAGC  
AGCCCTTGCGCCCTGAATTTTGTAAAATTCGCTTAAATTTTGTAAATCAGCTCATTTTTTAACCAATAGGCCGAAATCGCAAAATCCCTTATAAATCAAAAGAATAGACC  
GAGATAGGGTTGAGTGTGTTCCAGTTTGGAAACAAGAGTCCACTATTAAGAACGTGGACTCCAACGTCAAAGGGCGAAAAACCGTCTATCAGGGCGATGGCCACTACG  
TGAACCATCACCTAATCAAGTTTTTGGGGTGCAGGTGCCGTAAGCATAAATCGGAACCTAAAGGGAGCCCCGATTAGAGCTTACGCGGGAAGCCGCGCAACG  
TGCGGAGAAAGGAAGGAAGAAAGCGAAAGGAGCGGGCGCTAGGGCGCTGGCAAGTGTAGCGGTACGCTGCGCGTAACCACCACACCCGCCGCTTAAATGCGCCG  
CTACAGGGCGCGTC

**Supplementary Figure 9. Contaminant FISH probe sequence used in Fig. 2a.**

**Supplementary Table 1. Addgene AAV plasmids with P5 promoter downstream of CAP gene.**

*AAV serotype REPCAP plasmids available from plasmid repository addgene containing the P5 promoter downstream of the capsid gene. (Analysed for P5 presence in snap-gene).*

| <b>Plasmid</b>     | <b>Serotype</b> | <b>Addgene ID</b> | <b>Notes</b>   |
|--------------------|-----------------|-------------------|----------------|
| pAAV2_1            | AAV1            | 112862            |                |
| pAAV2_2            | AAV2            | 104963            | 2 copies of P5 |
| pAAV2_5            | AAV5            | 104964            | 2 copies of P5 |
| pAAV2_7            | AAV7            | 112863            |                |
| pAAV2_8            | AAV8            | 112864            |                |
| pAAV2_9n           | AAV9            | 112865            |                |
| pAAV2_rh10         | rh10            | 112866            |                |
| rAAV2-retro helper | AAV2-retro      | 81070             | 2 copies of P5 |
| 7M8                | 7M8             | 64839             | 2 copies of P5 |
| shh10              | shh10           | 64867             | 2 copies of P5 |
| pAnc80L65          | Anc80L65        | 68837             | 2 copies of P5 |
